# Supplementary material
Source: Springer Nature journal article supplement (https://www.springermedizin.de/resource/supplementary/12885_2008_1551_MOESM1_ESM.pdf/9472302)

**A**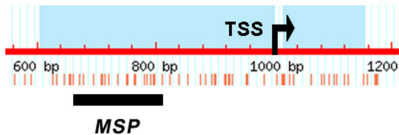**B**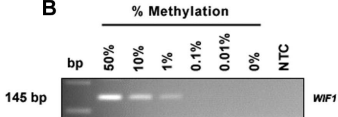

Supplement: MOESM1 [file 9472302]
